# Supplementary material for: The scheme, and regulative mechanism of pyroptosis, ferroptosis, and necroptosis in radiation injury
Source: PubMed Central journal article supplement (PMC10929204; doi:10.7150/ijbs.91112), 2024-03-03
Supplement: ijbsv20p1871s1.pdf [file ijbsv20p1871s1.pdf]

Supplementary Table 1 Dose for pyroptosis-, ferroptosis- and necroptosis-related radiation injury

| Affections              | Disease                                 | Cell line/animal                                                                                                      | Radiation regimen (dose/dose rate)                                | Reference |
|-------------------------|-----------------------------------------|-----------------------------------------------------------------------------------------------------------------------|-------------------------------------------------------------------|-----------|
| Pyroptosis              | Sepsis in radiotherapy                  | EA. hy926 cells; cGas <sup>-/-</sup> , Caspase-11 <sup>-/-</sup> mice, GSDMD <sup>-/-</sup> , Asc <sup>-/-</sup> mice | 14 Gy; 2.5 Gy/min                                                 | [72]      |
| Pyroptosis              | RI-lung injury                          | bone marrow cells                                                                                                     | 16 Gy                                                             | [112]     |
| Pyroptosis              | RI-lung injury (inflammation, fibrosis) | Male Sprague-Dawley (SD) rats, (210-230 g)                                                                            | 20 Gy (3 Gy/min)                                                  | [73]      |
| Pyroptosis              | RI-pneumonitis and fibrosis             | C57BL/6 mice (female, 8-week-old)                                                                                     | 18 Gy (X-ray)                                                     | [98]      |
| Pyroptosis              | RI-pneumonitis and fibrosis             | C57BL/6 mice (female, 6-8 weeks old, 18-22 g)                                                                         | Cell: 8Gy (X-ray); 297.43 cGy/min; Animal: 18Gy (X-ray); 2 Gy/min | [97]      |
| Pyroptosis              | RI-liver pyroptosis                     | ICR mice                                                                                                              | 0.25-1 Gy                                                         | [74]      |
| Pyroptosis              | RI-intestinal Injury                    | C57BL/6J mice                                                                                                         | 10 Gy; 2 Gy/min                                                   | [77]      |
| Pyroptosis              | RI-intestinal Injury                    | C57BL/6 mice (female, 6-8 weeks)                                                                                      | 9 Gy                                                              | [78]      |
| Pyroptosis              | RI-intestinal Injury                    | C57BL/6 mice (male)                                                                                                   | 4 Gy                                                              | [79]      |
| Pyroptosis              | RI-cardiopulmonary Injury               | BEAS-2B; C57BL/6J mice (6-8-week-old-male, around 20 g)                                                               | Cell: 4-6 Gy; Animal: 15 Gy ( $\gamma$ -ray); 0.8 Gy/min          | [99]      |
| Pyroptosis              | RI-brain injury                         | BV-2 microglia cells; BALB/c mice                                                                                     | Cell: 10 Gy; 3MeV/min; Animal: 15 Gy; 3 Gy/min                    | [75]      |
| Pyroptosis              | RI-salivary gland damage                | HUVECs; C57BL/6 mice (female, 6-week-old, 18-24 g)                                                                    | Cell: 8 Gy; 4 Gy/min; Animal: 15 Gy; 4 Gy/min                     | [76]      |
| Pyroptosis, apoptosis   | RI-intestinal Injury                    | BALB/c mice (female)                                                                                                  | 10 Gy; 2 Gy/min                                                   | [80]      |
| Pyroptosis, ferroptosis | RI-intestinal Injury                    | C57BL/6 mice                                                                                                          | 5, 10 Gy; 2 Gy/min                                                | [102]     |
| pyroptosis              | RI-intestinal injury                    | HIEC-6, HT29, sw620, LS174T; C57BL/6 mice (male, 6-8 weeks, 20-22 g)                                                  | Cell: 4Gy, 8Gy; Animal: 13Gy (0.99 Gy/min)                        | [116]     |
| Pyroptosis              | Double-edge                             | CT26; BALB/c mice (6-8 weeks, female); Wild-type (WT) and Gsdme <sup>-/-</sup> mice (C57BL/6 strain)                  | 8 Gy; 2 Gy/fraction at day 7, 14, 21, 28                          | [111]     |

|                            |                                                                 |                                                                                            |                                                                   |       |
|----------------------------|-----------------------------------------------------------------|--------------------------------------------------------------------------------------------|-------------------------------------------------------------------|-------|
| Pyroptosis                 | NA                                                              | Microvascular brain endothelial cells (ECs)                                                | NA Gy ( $\gamma$ -ray, 1.8 Gy/min)                                | [150] |
| Pyroptosis                 | NA                                                              | HUVEC                                                                                      | 10 Gy (X-ray)                                                     | [151] |
| Pyroptosis                 | NA                                                              | Macrophages                                                                                | 10 Gy (60Co)                                                      | [152] |
| Pyroptosis,<br>ferroptosis | NA                                                              | Ehrlich solid tumor-bearing mice                                                           | 6 Gy, 2*6 Gy, 3*4 Gy, 4*2 Gy (X-ray); 200 Mu/min                  | [153] |
| Ferroptosis                | Double-edge; Radiation<br>resistance; RI-intestinal<br>injuries | IEC-6                                                                                      | 9 Gy (1.0 Gy/min)                                                 | [120] |
| Ferroptosis                | RI-myelosuppression                                             | Mouse hematopoietic stem cells; C57BL/6 mice,<br>ApoE <sup>-/-</sup> , Ldlr <sup>-/-</sup> | Animal: 5 Gy, 7.5 Gy (92.8-95.5 cGy/min)                          | [119] |
| Ferroptosis                | RI-epithelial injury                                            | HaCaT; Sprague-Dawley rats (160 $\pm$ 20 g)                                                | Cell: 12 Gy (6 Gy/min); Animal: 10 Gy (4 Gy/min)                  | [113] |
| Ferroptosis                | RI-hippocampal neuron<br>injury                                 | HT-22; C57BL/6 J mice (male)                                                               | Cell: 5 Gy; Animal: 8 Gy                                          | [92]  |
| Ferroptosis                | RI-skin injury                                                  | HaCaT; Sprague-Dawley (SD) rats (female, 200 $\pm$<br>10g)                                 | Cell: 20 Gy; Animal: 40 Gy                                        | [93]  |
| Ferroptosis                | Healing of Irradiated Wound                                     | NIH/3T3 mouse embryonic fibroblasts; SD rats<br>(male, 10-11 weeks old, 250-300 g)         | Cell: 4 Gy (60Co, $\gamma$ -ray, 3 Gy/min); Animal: 6 Gy          | [91]  |
| Ferroptosis                | hematopoietic acute radiation<br>syndrome                       | ICR mice (male, 8-10 weeks old)                                                            | Cell: 8 Gy; Animal: 8, 10 Gy; 2 Gy/min                            | [89]  |
| Ferroptosis                | RI bleeding                                                     | granulocyte-macrophage hematopoietic progenitor<br>cells; ICR mice (male, 8-10 weeks)      | Cell: 4-8 Gy; Animal: 10 Gy; 2 Gy/min                             | [90]  |
| Ferroptosis,<br>apoptosis  | RI-intestinal injury                                            | C57BL/6J; HIEC-6, intestinal crypt organoids                                               | Cell: 6 Gy; Animal: 13 Gy                                         | [115] |
| Ferroptosis                | RI-intestinal injury                                            | Male C57BL/6J mice aged 6-8 weeks (21-25 g);<br>FHs74Int, intestinal organoids             | Cell: 0.189 Gy/min; Animal: 11, 14, 15, 17 Gy (6 Gy/min)          | [81]  |
| Ferroptosis                | RI-intestinal injury                                            | HIEC; C57BL/6J mice (4-8-week-old male)                                                    | Cell: 6 Gy (X-ray, 1.1 Gy/min); Animal: 14 Gy (X-ray, 1.1 Gy/min) | [82]  |

|                        |                        |                                                                                                   |                                                                                                                                                                                                                                         |       |
|------------------------|------------------------|---------------------------------------------------------------------------------------------------|-----------------------------------------------------------------------------------------------------------------------------------------------------------------------------------------------------------------------------------------|-------|
| Ferroptosis            | RI-intestinal injury   | C57BL/6 mice (female, 6-8 weeks, 25 g)                                                            | 14 Gy (400 Mu/min)                                                                                                                                                                                                                      | [84]  |
| Ferroptosis            | RI-lung fibrosis       | C57BL/6 mice (4-6 weeks old, female)                                                              | 15 Gy (X-ray, 2 Gy/min)                                                                                                                                                                                                                 | [88]  |
| Ferroptosis            | RI-lung injury         | A549; C57BL/6 mice (female, 5-7 weeks old, 19-23 g)                                               | Cell and Animal: 10 Gy (2 Gy/min)                                                                                                                                                                                                       | [85]  |
| Ferroptosis            | RI-lung injury         | HULEC-5a; C57BL/6 mice                                                                            | 15 Gy                                                                                                                                                                                                                                   | [154] |
| Ferroptosis            | RI-lung injury         | BEAS-2B; C57BL/6 mice                                                                             | Cell: 15 Gy; Animal: 10 Gy                                                                                                                                                                                                              | [86]  |
| Ferroptosis            | RI-lung injury         | C57BL/6 mice (female, 20 ± 2 g)                                                                   | 15Gy (6MV, X-ray)                                                                                                                                                                                                                       | [87]  |
| Ferroptosis            | RI-multi-organ injury  | IEC6; male C57BL/6 mice, BALB/c-Nude mice                                                         | Cell: 8 Gy or 10 Gy ( $\gamma$ -ray, 0.99 Gy/min); Animal: WBI: 4Gy, 7.2 Gy, 7.5 Gy, 10 Gy, 12.5 Gy (0.99 Gy/min, $\gamma$ ray); ABI: 15 Gy, 18 Gy ( $\gamma$ ray, 0.99 Gy/min); lung fibrosis: 17 Gy (X-ray, 0.99 Gy/min, 3.23 Gy/min) | [121] |
| Ferroptosis, apoptosis | RI-intestinal injuries | HIEC; C57 BL/6 J mice (6-8 weeks, male)                                                           | Cell: 4 Gy (X-ray, 1.15 Gy/min); Animal: 9 Gy (60Co, $\gamma$ -ray, 2 Gy/min)                                                                                                                                                           | [114] |
| Ferroptosis, apoptosis | RI-intestinal injuries | Balb/c mice (male, 20 ± 2 g)                                                                      | 2 Gy (60Co, $\gamma$ -ray, 1 Gy/min)                                                                                                                                                                                                    | [122] |
| Ferroptosis, apoptosis | RI-intestinal injury   | Caco2 (HTB-37), HIEC6 (CRL-3266); C57BL/6J mice (7-8 weeks old, female)                           | 9.25 Gy                                                                                                                                                                                                                                 | [83]  |
| Ferroptosis            | RI-lung injury         | A549                                                                                              | 10 Gy (X-ray, 2 Gy/min)                                                                                                                                                                                                                 | [146] |
| Ferroptosis            | NA                     | AHH-1 lymphocytes                                                                                 | 2.4, 4.8, 7.2, 28.8 mGy (7, 14, 26, 34, 43 $\mu$ Gy/h, $\gamma$ -ray)                                                                                                                                                                   | [123] |
| Ferroptosis            | NA                     | ER-positive (MCF-7 and ZR-75-1) and ER-negative (MDA-MB-231)                                      | 8 Gy (X-ray)                                                                                                                                                                                                                            | [155] |
| Ferroptosis            | NA                     | HepG2, SMMC-7721, Huh7, Huh6, HT1080; HepG2-IRR (2, 4, 6, 8 Gy, 6 Gy/min)                         | Cell: 10 Gy (6 Gy/min)                                                                                                                                                                                                                  | [156] |
| Ferroptosis            | NA                     | KGN                                                                                               | 2 Gy                                                                                                                                                                                                                                    | [157] |
| Necroptosis            | RI-rectal injury       | HIEC; C57BL/6mice (female, 5-week-old, 20 g)                                                      | Cell: 0, 1, 2, 4, 6, 8 Gy (3.6 Gy/min, X-ray); Animal: 25 Gy (X-ray, 3.6 Gy/min)                                                                                                                                                        | [95]  |
| Necroptosis            | RI-injury              | Mouse embryonic Cyt c <sup>-/-</sup> cells, Cyt c <sup>+/+</sup> cells; C57BL/6NTac mice (female) | 9.25 Gy, 9.5 Gy (80 cGy/min)                                                                                                                                                                                                            | [125] |

|             |                |                                                                                                         |                                                  |       |
|-------------|----------------|---------------------------------------------------------------------------------------------------------|--------------------------------------------------|-------|
| Necroptosis | RI-injury      | C57BL/6NTac mice (female, 30-33 g); Bone marrow stromal cell lines, hematopoietic progenitor cell lines | Cell: 0-8 Gy; Animal: 9.25 Gy (TBI, 343 cGy/min) | [124] |
| Necroptosis | RI-lung injury | C57BL/6 mice                                                                                            | 15 Gy (X-ray, 200 cGy/min)                       | [94]  |

RI: radiation-induced; RT: radiotherapy; NA: not applicable.

Supplementary Table 2 The agents and regulative mechanism for pyroptosis-, ferroptosis- and necroptosis-related radiation injury

| Affections | Disease                                    | Cell line/animal                                            | Drugs                                                                                         | Indicators                                                                                                                                                                                                                                                                                                                                                                                                                                                  | PMID  |
|------------|--------------------------------------------|-------------------------------------------------------------|-----------------------------------------------------------------------------------------------|-------------------------------------------------------------------------------------------------------------------------------------------------------------------------------------------------------------------------------------------------------------------------------------------------------------------------------------------------------------------------------------------------------------------------------------------------------------|-------|
| Pyroptosis | RI-lung injury<br>(inflammation, fibrosis) | Male Sprague-Dawley (SD) rats,<br>(210-230 g)               | ACT001 (50, 100, 200<br>mg/kg)                                                                | ACT001→IL-6, TNF- $\alpha$ , IL-1 $\beta$ , NLRP3, ASC, GSDMD $\downarrow$ , LDH→pyroptosis $\downarrow$ →IR-<br>lung injury--EMT (TGF- $\beta$ 1, E-cadherin, $\alpha$ -smooth muscle actin ( $\alpha$ -SMA), vimentin) $\downarrow$                                                                                                                                                                                                                       | [73]  |
| Pyroptosis | RI-cardiopulmonary<br>injury               | BEAS-2B; C57BL/6J mice (6-8-<br>week-old-male, around 20 g) | gut microbiota-derived I-<br>Histidine; Cell: imidazole<br>propionate (ImP) (8<br>$\mu$ L/mL) | IR+gut microbiota-derived I-Histidine: radiation toxicity in lung and heart $\downarrow$ ; I-<br>Histidine→rely on gut microbiota configuration and metabolome changes,<br>assimilation of imidazole propionate (maybe gram-positive bacteria)→radioprotection<br>I-Histidine and ImP→proliferation<br>IR: GSDMD, TNF- $\alpha$ , NF- $\kappa$ B $\uparrow$<br>IR+ImP→pyroptosis (GSDMD, caspase-1, caspase-4, caspase-5) $\downarrow$ , F-actin $\uparrow$ | [99]  |
| Pyroptosis | RI-brain injury                            | BV-2 microglia cells; BALB/c mice                           | Mesenchymal stem cells<br>(MSCs)                                                              | IR+MSCs→NLRP3 $\downarrow$ , caspase-1 $\downarrow$ , ROS $\downarrow$ →caspase-1 dependent pyroptosis $\downarrow$                                                                                                                                                                                                                                                                                                                                         | [75]  |
| Pyroptosis | RI-lung injury                             | Bone marrow cells                                           | Pulmozyme                                                                                     | RT→dsDNA→cGAS-STING-NLRP3→IL-1 $\beta$ , IL-18, GSDMD-<br>N $\uparrow$ →pyroptosis $\uparrow$ →IR-lung injury $\uparrow$ ; Pulmozyme→dsDNA $\downarrow$ →IR-lung injury $\downarrow$                                                                                                                                                                                                                                                                        | [112] |
| Pyroptosis | RI-intestinal Injury                       | C57BL/6J mice                                               | Micheliolide: Cell: 10 $\mu$ M;<br>Animal: 50mg/kg                                            | mucosal injury, necrosis, loss of tissue structure, edema, and inflammatory cell<br>infiltration $\downarrow$ ; IR+Micheliolide→survival $\uparrow$ , body weigh $\uparrow$ , IL-1 $\beta$ , IL-18, TGF- $\beta$ 1, TNF-<br>$\alpha$ , IFN- $\gamma$ $\downarrow$ , caspase-1, cleaved caspase-1, GSDMD-N $\downarrow$ , autophagosomes and<br>autolysosomes, LC3, p62, beclin 1 $\uparrow$ →NLRP3 inflammasome-dependent pyroptosis $\downarrow$           | [77]  |
| Pyroptosis | RI-intestinal Injury                       | C57BL/6 mice (female, 6–8 weeks)                            | 5-AED                                                                                         | IR+5-AED: caspase-1 p10 $\downarrow$ +GSDMD-N $\downarrow$ +NF- $\kappa$ B $\uparrow$ , pyroptosis $\downarrow$ ; AIM2,<br>ASC= $\downarrow$ interaction                                                                                                                                                                                                                                                                                                    | [78]  |
| Pyroptosis | RI-liver pyroptosis                        | ICR mice                                                    | rMnSOD                                                                                        | rMnSOD+IR→caspase1 $\downarrow$ , SMPD1 $\uparrow$ , SMPD2 $\downarrow$ (limited contral in SMPD1), aSMase $\downarrow$ ,<br>nSMase1 $\downarrow$ →IR-liver pyroptosis $\downarrow$                                                                                                                                                                                                                                                                         | [74]  |
| Pyroptosis | RI-salivary gland<br>damage                | HUVECs; C57BL/6 mice (female,<br>6-week-old, 18–24 g)       | NaNO <sub>3</sub> (0.1, 0.5, 2, 5<br>mmol/L)                                                  | IR+nitrate (NaNO <sub>3</sub> ) →complex I $\uparrow$ , ROS $\downarrow$ , IL-1 $\beta$ =/ $\downarrow$ , GSDMD $\downarrow$ , GSDMD-NT $\downarrow$ ,<br>NLRP3 $\downarrow$ , ASC $\downarrow$ , IL-18 $\downarrow$ →acinar cells and microvascular endothelial cells $\uparrow$ +NLRP3-<br>mediated pyroptosis $\downarrow$                                                                                                                               | [76]  |

|                         |                                   |                                                                                                                      |                                                                                              |                                                                                                                                                                                                                                                   |       |
|-------------------------|-----------------------------------|----------------------------------------------------------------------------------------------------------------------|----------------------------------------------------------------------------------------------|---------------------------------------------------------------------------------------------------------------------------------------------------------------------------------------------------------------------------------------------------|-------|
| Pyroptosis, apoptosis   | RI-intestinal Injury              | BALB/c mice (female)                                                                                                 | Flagellin A N/C (FlaAN/C): 1mg/kg                                                            | IR+FlaAN/C→ROS, NLRP3, caspase-1, IL-1β, IL-18, IL-8, IL-6, TNF-α, MCP-1↓→pyroptosis+apoptosis↓→villi↑, cellular infiltration and hemorrhage areas↓                                                                                               | [80]  |
| Pyroptosis, apoptosis   | RI-intestinal Injury              | C57BL/6 (male)                                                                                                       | p-Coumaric acid (CA)                                                                         | IR+CA→caspase-1, NLRP3, AIM2↓, Occludin, ZO-1, Claudin-5↑→intestinal injury↓, apoptosis↓, antioxidant indexes↑, inflammation response↓                                                                                                            | [79]  |
| Pyroptosis, ferroptosis | RI-intestinal Injury              | C57BL/6                                                                                                              | PDTC                                                                                         | IR+VX-765→IL-18, IL-1β, caspase 1↓→pyroptosis↓→injury↓; IR+Fer-1→GPX4↓, iron ↑, 4-hydroxynonenal (4-HNE) ↑, MDA↑, GSH↓→lipid peroxidation↓→ferroptosis↓→injury↓; PDTC→NF-κB↓→injury↓ above indicators occur                                       | [102] |
| Pyroptosis              | Sepsis in radiotherapy            | EA.hy926 cells; cGas <sup>-/-</sup> , caspase-11 <sup>-/-</sup> mice, GSDMD <sup>-/-</sup> , Asc <sup>-/-</sup> mice | NA                                                                                           | deficiency of cGAS→survival↑, radiation-promoted sepsis↓, caspase-11↓, IFNβ, IL-1α, IL-1β↓, permeability of alveolar capillaries↓, edema↓; cGAS↓→caspase-11↓→pyroptosis↓→radiation-promoted sepsis↓                                               | [72]  |
| Ferroptosis             | Double-edge; RI-intestinal injury | HIEC-6, HT29, sw620, LS174T; C57BL/6 mice (male, 6-8 weeks, 20-22 g)                                                 | Engelhardia roxburghiana Wall. Leaves                                                        | Engelhardia roxburghiana Wall. leaves →NRF2↑, HO-1, NQO1↑→SOD, GSH, IL-6, TNF-α↓→IR-intestinal injury↓, radiosensitivity↑                                                                                                                         | [116] |
| Ferroptosis             | RI-epithelial injury              | HaCaT; Sprague-Dawley rats (160 ± 20 g)                                                                              | Lycium barbarum polysaccharide-glycoprotein                                                  | Lycium barbarum polysaccharide-glycoprotein (LBP)→NRF2↑→HO-1, NQO1, SLC7A11, FTH1↑→ferroptosis↓→IR-epithelial injury↓                                                                                                                             | [113] |
| Ferroptosis             | RI-lung injury                    | A549; C57BL/6 mice (female, 5-7 weeks old, 19-23 g)                                                                  | Astragaloside IV (20 or 40 mg/kg)                                                            | RT→Fe2+, LDH, MDA, IL-6, TNF-α, IL-1β↑, NRF2, HO1, NQO1, GSH ↓→ferroptosis↑→IR-lung injury↑; Astragaloside IV→ferroptosis↓→IR-lung injury↓                                                                                                        | [85]  |
| Ferroptosis, apoptosis  | RI-intestinal injury              | C57BL/6J; HIEC-6, intestinal crypt organoids                                                                         | Perillaldehyde                                                                               | Perillaldehyde→NRF2, GPX4, GSH↑, ROS, PTGS2↓→ferroptosis, apoptosis, DNA damage↓→proliferation, differentiation→intestinal permeability, barrier damage↓→survival↑                                                                                | [115] |
| Ferroptosis, apoptosis  | RI-intestinal injury              | HIEC; C57 BL/6 J mice (6-8-week-old male)                                                                            | Green tea derivative (-)-epigallocatechin-3-gallate (EGCG) (Cell: 2μM, Animal: 12.5,25mg/kg) | EGCG: NRF2↑, translocation of NRF2 from the cytoplasm to the nucleus↑→SLC7A11, HO-1, GPX4↑→ROS↓→DNA damage, apoptosis, γH2AX foci, ferroptosis↓, Lgr5+ intestinal stem cells (ISCs), ISCs Ki67+ cells↑→intestinal mucosal injury↓, survival time↑ | [114] |

|                        |                                                           |                                                                                         |                                                                    |                                                                                                                                                                                                                          |       |
|------------------------|-----------------------------------------------------------|-----------------------------------------------------------------------------------------|--------------------------------------------------------------------|--------------------------------------------------------------------------------------------------------------------------------------------------------------------------------------------------------------------------|-------|
| Ferroptosis, apoptosis | RI-intestinal injury                                      | Caco2 (HTB-37), HIEC6 (CRL-3266); C57BL/6J mice (7-8 weeks old, female)                 | PAO1                                                               | pseudomonas aeruginosa (PAO1)→antiferroptotic system, GSH/GPX4↓, 15-HpETE-PE↑→oxidized phosphatidylethanolamine (PEox)↑→ferroptosis↑, survival↓                                                                          | [83]  |
| Ferroptosis            | RI-skin injury                                            | HaCaT; Sprague-Dawley (SD) rats (female, 200 ± 10g)                                     | Plasmid encoding human MnSOD                                       | Plasmid encoding human MnSOD→ ROS, ACSL4↓, GPX4, SLC7A11↑→ferroptosis↓→SOD↑→IR-skin injury↓                                                                                                                              | [93]  |
| Ferroptosis            | Healing of irradiated wound                               | NIH/3T3 mouse embryonic fibroblasts; SD rats (male, 10-11 weeks old, 250–300 g)         | RPEXos (from healthy rats, Cell: 400 g/ml exosomes); Ferrostatin-1 | RPEXos↑→GPX4, NRF2, FTH1↑, Fe2+↓→ferroptosis↓→healing↑; RPEXos↑→proliferation, migration, cell cycle progression (G0/G1↓, S↑), cell survival↑, cell proliferation and radioresistance-related genes↑, ferroptosis↓       | [91]  |
| Ferroptosis            | RI-hippocampal neuron injury                              | HT-22; C57BL/6J mice (male)                                                             | Melatonin (10mg/kg in animal)                                      | Melatonin→PKM2 bind to NRF2 thus entering the nucleus↑→GPX4↑→ferroptosis↓→IR-hippocampal neuron injury↓                                                                                                                  | [92]  |
| Ferroptosis            | RI-myelosuppression                                       | Mouse hematopoietic stem cells; C57BL/6 mice, ApoE <sup>-/-</sup> , Ldlr <sup>-/-</sup> | Cholesterol c                                                      | Cholesterol→SLC38A9-mTOR →SLC7A11/GPX4↑ferritinophagy↓→ferroptosis resistance of myeloid-biased hematopoietic stem cells↑→IR-myelosuppression↓                                                                           | [119] |
| Ferroptosis            | RI-intestinal injury                                      | Male C57BL/6J mice aged 6-8 weeks (21-25 g); FHs74Int, intestinal organoids             | Ferrostatin-1 (5mg/kg/d)                                           | RT→STAT1-IRF1-ACSL4→GPX4↓, SLC3A2↓→ferroptosis↑→IR-intestinal injury↑; Ferrostatin-1→ferroptosis, IR-intestinal injury↓→survival↑                                                                                        | [81]  |
| Ferroptosis            | RI-intestinal injury                                      | HIEC; C57BL/6J mice (4-8 weeks, male)                                                   | si NCOA4; DFO (100mg/kg)                                           | IR→NCOA4→ferritinophagy↑→iron↑→MFRN2↑, TRF1↑, FPN1, FTL, FTH↓→extensive mitochondrial fragmentation and peri-nuclear aggregation↑→iron to nuclear↑, ROS↑→ferroptosis↑; iron-deficient diet→IR-induced intestinal injury↓ | [82]  |
| Ferroptosis            | Double-edge; Radiation resistance; RI-intestinal injuries | IEC-6                                                                                   | Ferrostatin-1                                                      | Ferrostatin-1 → GPX4↓→ferroptosis↓, gut-microbe balance restore→IR-intestinal injuries↓, radioresistance↓                                                                                                                | [120] |
| Ferroptosis            | RI-lung fibrosis                                          | C57BL/6 mice (4-6 weeks old, female)                                                    | Liproxstatin-1 (10 mg/kg)                                          | liproxstatin-1→NRF2, HO1, NQO1↑→TGF-β1↓→RILF↓; IR: GPX4↓→ferroptosis↑; liproxstatin-1→GPX4↑, ROS, HYP↓→ferroptosis↓                                                                                                      | [88]  |
| Ferroptosis            | RI-lung injury                                            | BEAS-2B; C57BL/6 mice                                                                   | NVP-AUY922 (Cell: 10nM, Animal: 10mg/kg)                           | NVP-AUY922→HSP90-mediated CMA pathway↓→lysosomal degradation of GPX4↓→ferroptosis↓→IR-induced lung injuries, inflammatory cell infiltration,                                                                             | [86]  |

|             |                       |                                                                                                         |                                                                                                                                                |                                                                                                                                                                                                                                                         |       |
|-------------|-----------------------|---------------------------------------------------------------------------------------------------------|------------------------------------------------------------------------------------------------------------------------------------------------|---------------------------------------------------------------------------------------------------------------------------------------------------------------------------------------------------------------------------------------------------------|-------|
|             |                       |                                                                                                         |                                                                                                                                                | proinflammatory cytokine release, and lung epithelial BEAS-2B cell damage (TNF- $\alpha$ , IL-6, IL-1 $\beta$ ) ↓                                                                                                                                       |       |
| Ferroptosis | RI-lung injury        | C57BL/6 mice (female, 20 ± 2 g)                                                                         | Liproxstatin-1 (10mg/kg once daily for 30 days)                                                                                                | liproxstatin-1: GPX4↑, ROS↓ → TNF- $\alpha$ , IL-6, IL-10, TGF- $\beta$ 1↓ → ferroptosis↓ → structure damage and hemorrhage↓                                                                                                                            | [87]  |
| Ferroptosis | RI-multi-organ injury | IEC6; male C57BL/6 mice, BALB/c-Nude mice                                                               | Compound 5 (1/2 maximum tolerance dose, 517mg/kg)                                                                                              | Compound 5 → highest binding capability, survival rate: 80%, TBI-induced hematopoietic system injury↓, IR-induced lung injury↓; Compound 5 → NOX1↓ → total ROS and lipid ROS↓ (GSH, GPX4↑) → ferroptosis↓ → TBI-induced gastrointestinal (GI) syndrome↓ | [121] |
| Ferroptosis | RI-lung injury        | A549                                                                                                    | NA                                                                                                                                             | IR: ROS↑ → ferroptosis↑; P62, NRF2↑ → GSH↓, MDA↑, mitochondrial membrane↓, GPX4↓, ACSL4↑, HO1, FTH1, NQO1↑ → ferroptosis↑, IR-induced lung injury↑                                                                                                      | [146] |
| Ferroptosis | RI-intestinal injury  | C57BL/6 (female mice, 6-8 weeks, 25 g)                                                                  | NA                                                                                                                                             | IR: intestinal bacteria and fungi↑ → ACSL4↑ → ferroptosis↑ → IR-induced intestinal injury↑                                                                                                                                                              | [84]  |
| Ferroptosis | RI-lung injury        | HULEC-5a; C57BL/6 mice                                                                                  | NA                                                                                                                                             | IR: PIEZO1↑ → calcium influx, calpain activity↑ → degradation of VE-cadherin↑ → ROS, lipid peroxidation, mitochondria shrinkage↑, GPX4, SLC7A11 ↓ → ferroptosis↑ → IR-lung injury↑                                                                      | [154] |
| Necroptosis | RI-injury             | C57BL/6NTac mice (female, 30-33 g); Bone marrow stromal cell lines, hematopoietic progenitor cell lines | JP4-039 (20 mg/kg), necrostatin-1 (1.65 mg/kg) and/or lipoxigenase-15 inhibitor (baicalein) (50 mg/kg) in single-, dual-or three-drug regimens | Drug → survival↑                                                                                                                                                                                                                                        | [124] |
| Necroptosis | RI-lung injury        | C57BL/6 mice                                                                                            | Crocetin: 100, 200 mg/Kg                                                                                                                       | Crocetin → Tnfrsf10b↓ → necroptosis↓ → IR-lung injury↓                                                                                                                                                                                                  | [94]  |
| Necroptosis | RI-rectal injury      | HIIEC; C57BL/6mice (female, 5-week-old, 20 g)                                                           | NA                                                                                                                                             | IR → necroptosis↑; NRF2 → necroptosis↓ → IR-injury↓                                                                                                                                                                                                     | [95]  |



---

|             |           |                                                                                                   |               |                                                                               |       |
|-------------|-----------|---------------------------------------------------------------------------------------------------|---------------|-------------------------------------------------------------------------------|-------|
| Necroptosis | RI-injury | Mouse embryonic Cyt c <sup>-/-</sup> cells, Cyt c <sup>+/+</sup> cells; C57BL/6NTac mice (female) | Necrostatin-1 | Necrostatin-1→RIPK1, p-RIPK3↓→necroptosis↓→survival after lethal irradiation↑ | [125] |
|-------------|-----------|---------------------------------------------------------------------------------------------------|---------------|-------------------------------------------------------------------------------|-------|

---

RI: radiation-induced; RT: radiotherapy; IR: ionizing radiation; NA: not applicable.

Supplementary Table 3 Immune regulation in pyroptosis- and ferroptosis-related radiation injury

| Affections | Disease                     | Immune cell                             | Cell line/animal                                                                                                                       | Drugs                                      | Indicators                                                                                                                                                                                                                                                                                                                                                                           | Reference |
|------------|-----------------------------|-----------------------------------------|----------------------------------------------------------------------------------------------------------------------------------------|--------------------------------------------|--------------------------------------------------------------------------------------------------------------------------------------------------------------------------------------------------------------------------------------------------------------------------------------------------------------------------------------------------------------------------------------|-----------|
| Pyroptosis | RI-lung injury              | Macrophages                             | ANA-1, MH-S, C57BL/6 mice (female, 6-8 weeks, weight: 18-22 g)                                                                         | MiR-223-3p                                 | IR→caspase 1-p10, GSDMD-N, NLRP3, IL-18, IL-1β, TNF-α, IL-1α, CCL-2, LDH↑→IR-lung injury↑; MiR-223-3p→NLRP3↓→macrophages pyroptosis↓→inflammatory response, IR-lung injury↓                                                                                                                                                                                                          | [96]      |
| Pyroptosis | RI-pneumonitis and fibrosis | T lymphocytes, macrophages, neutrophils | C57BL/6 mice (female, 8-week-old)                                                                                                      | Re-Du-Ning (RDN)                           | IR+RDN: IL-1β, IL-6, TNF-α, AIM2-mediated pyroptosis↓; RDN→EMT (α-SMA, E-cadheri, CDH1, CDH2, VIM, and ACTA2)↓→fibrosis↓; RDN→p-PI3K↓→p-AKT↓→fibrosis↓; RDN→AIM2 inflammasome↓→pyroptosis↓; RDN+4, 8, and 20 weeks after radiation: edema, hyperemia, inflammatory cell infiltration↓; immune cell infiltration: T lymphocytes, macrophages, neutrophils, BALF↓; IL-1β, IL-6, TNF-α↓ | [98]      |
| Pyroptosis | RI-pneumonitis and fibrosis | Macrophages                             | C57BL/6 mice (female, 6-8 weeks old, 18-22 g)                                                                                          | Andrographolide (5, 10, 20 mg/kg)          | IR+Andrographolide→bone marrow-derived macrophages (BMDMs) AIM2 translocating into the nucleus↓→pyroptosis↓; IR-induced lung tissue damage, inflammatory cell infiltration, and pro-inflammatory cytokine release, EMT, progressive fibrosis, caspase-1, IL-1β, pyroptosis↓, NF-κB, MAPK↓ in an ROS-independent manner                                                               | [97]      |
| Pyroptosis | Double-edge                 | NK cells                                | CT26; BALB/c mice (6-8 weeks, female); Wild-type (WT) and Gsdme <sup>-/-</sup> mice (C57BL/6 strain)                                   | GSDME KO                                   | GSDME: IECs > CRC; GSDME→caspase-3↑→pyroptosis↑→NK cells activation and recruitment→radioresistance and radiation injury (intestine, stomach, liver and pancreas)                                                                                                                                                                                                                    | [111]     |
| Pyroptosis | Anti-tumor Immunity         | T lymphocytes                           | PC-9, SF126, U251, HepG2, SF268, Huh-7, HCCLM3, MHCC-97L, T47D, THP1, 4T1, U87MG, MCF-7, MDA-MB-231; H1299, Calu-1, A172, BT549, H460, | Cisplatin/etoposide/decitabine/azacytidine | cisplatin/etoposide/decitabine/azacytidine + IR: →pyroptosis↑; IR→caspase-9↑→caspase-3↑→GSDME↑→pyroptosis↑→cytotoxic T lymphocytes↑+ cytokines↑                                                                                                                                                                                                                                      | [109]     |

|                        |                                        | H226, MDA-MB-468, Hep3B; Balb/c mice |                                                                                    |                                                                       |                                                                                                                                                                                                                                                                   |       |
|------------------------|----------------------------------------|--------------------------------------|------------------------------------------------------------------------------------|-----------------------------------------------------------------------|-------------------------------------------------------------------------------------------------------------------------------------------------------------------------------------------------------------------------------------------------------------------|-------|
| Pyroptosis             | RI-intestinal Injury                   | CD8+ T cells                         | C57BL/6 mice                                                                       | anti-PD-L1                                                            | FLASH-X ray vs. conventional RT in PD-L1 KO mouse: CD8+ T cells, pyroptosis, GSDME-NT↓                                                                                                                                                                            | [110] |
| Ferroptosis            | Hematopoietic acute radiation syndrome | Lymphocytes, monocytes               | ICR mice (male, 8-10 weeks old)                                                    | Ferrostatin-1 (2 mg/kg)                                               | Ferrostatin-1: hemosiderin and liable iron pool↓, ASCL4 and GPX4↑, TNF-a, IL-6, IL-1β→ferroptosis of BMSCs↓→red and white blood cells, lymphocytes, monocytes↑→survival rate↑                                                                                     | [89]  |
| Ferroptosis            | RI-bleeding                            | Lymphocytes                          | Granulocyte-macrophage hematopoietic progenitor cells; ICR mice (male, 8-10 weeks) | LDN 193189 (3 mg/kg); Ferrostatin-1 (2 mg/kg); DFO (50/140/210 mg/kg) | IR: iron content in bone marrow↑, iron metabolism (Ferroportin-1↑, iron regulatory protein 1 and 2↓) →white blood cells and lymphocytes counts↓→ferroptosis↑→GM-HPC counts↓; IR+LDN: white blood cells and lymphocytes counts↑, iron content, hepcidin↓→survival↑ | [90]  |
| Ferroptosis, apoptosis | RI-intestinal injuries                 | Lymphocytes                          | Balb/c mice (male, 20 ± 2 g)                                                       | Liproxstatin-1 (10mg/kg once daily for 30 days)                       | liproxstatin-1→LPCAT3, ALOX15↑→mitochondrial damage↓, MDA↓→ferroptosis↓, intraepithelial lymphocytes↑, IL-17↑, TGF-β, IFN-γ↓                                                                                                                                      | [122] |
| Ferroptosis            | NA                                     | Lymphocytes                          | AHH-1 lymphocytes                                                                  | NA                                                                    | 0-4.8 mGy: TFRC1, SLC3A2, SLC39A8, FTH1, ACSL4, GPX4↓; 4.8-28.8 mGy: TFRC1, SLC3A2, SLC39A8, FTH1, ACSL4, GPX4↑                                                                                                                                                   | [123] |

RI: radiation-induced; RT: radiotherapy; IR: ionizing radiation; NA: not applicable.
